# Supplementary material for: X-ray radiation shielding and microscopic studies of flexible and moldable bandage byin situsynthesized cerium oxide nanoparticles/MWCNTS nanocomposite for healthcare applications
Source: Royal Society of Chemistry journal article supplement (doi:10.1039/d3ra00067b), 2023-01-01
Supplement: d3ra00067b1.pdf [file d3ra00067b1.pdf]

**X-ray radiation shielding and microscopic studies of flexible and moldable bandage by in-situ synthesized Cerium oxide nanoparticles /MWCNTS nanocomposite for healthcare applications**

Sarika Verma<sup>a,b,\*</sup>, Manish Dhangar<sup>a</sup>, Harsh Bajpai<sup>a</sup>, Kamna Chaturvedi<sup>a</sup>, Ranjan K. Mohapatra<sup>c,\*</sup>, Mohd. Akram Khan<sup>a,b</sup>, Mohammad Azam<sup>d,\*</sup>, Saud I. Al-Resayes<sup>d</sup>, Avanish Kumar Srivastava<sup>a,b</sup>

*<sup>a</sup>Council of Scientific and Industrial Research- Advanced Materials and Processes Research Institute, Hoshangabad Road, Bhopal (M.P.), 462026, India.*

*<sup>b</sup>AcSIR-Advanced Materials and Processes Research Institute (AMPRI), Hoshangabad Road, Bhopal (M.P) 462026, India*

*<sup>c</sup>Department of Chemistry, Government College of Engineering, Keonjhar-758002, Odisha, India*

*<sup>d</sup>Department of Chemistry, College of Science, King Saud University, PO BOX 2455, Riyadh 11451, Saudi Arabia*

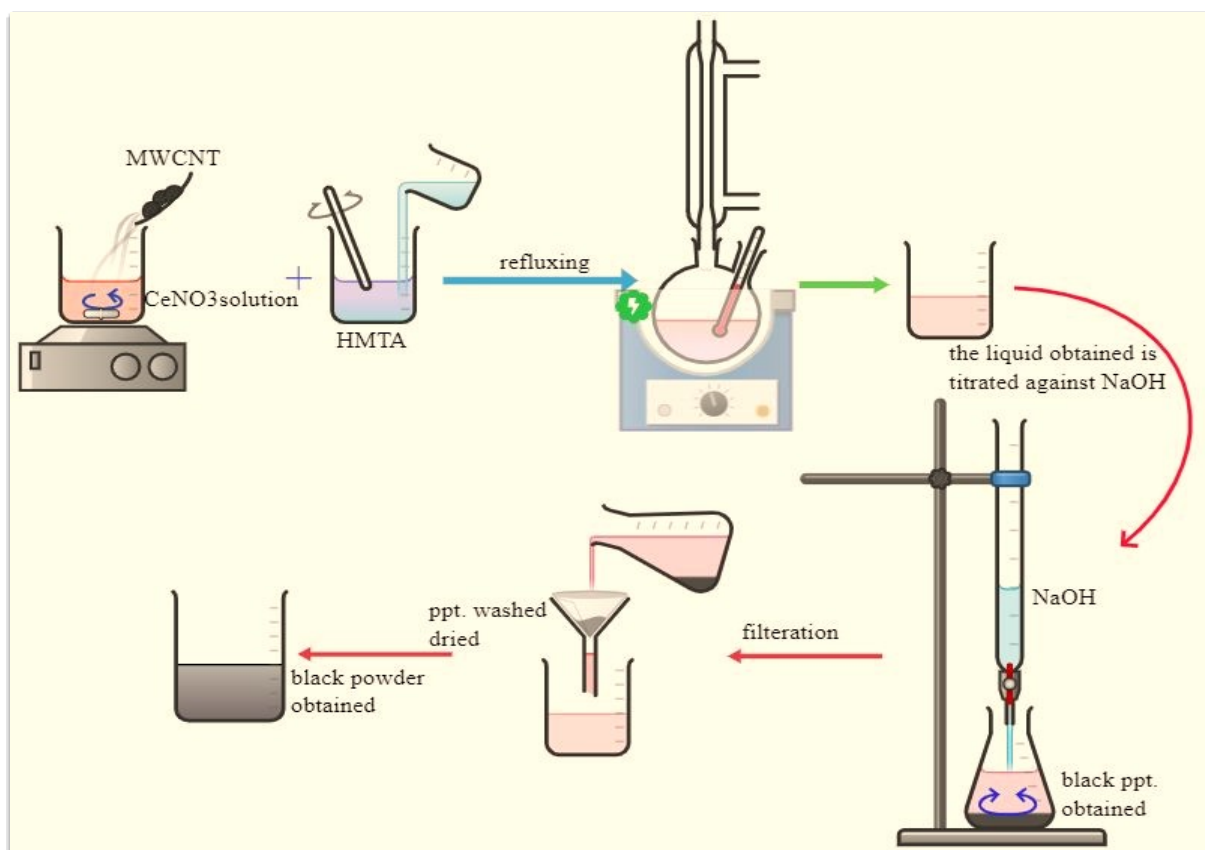

**Fig. S1.** Preparation of advanced hybrid CeO<sub>2</sub>/MWCNTs nanocomposite
